# Supplementary material for: Influence of particle size and dielectric environment on the dispersion behaviour and surface plasmon in nickel nanoparticles
Source: Royal Society of Chemistry journal article supplement (doi:10.1039/c7cp01769c), 2017-01-01
Supplement: c7cp01769c1.pdf [file c7cp01769c1.pdf]

## Electronic Supplementary Information

### Influence of Particle Size and Dielectric Environment on Dispersion Behaviour and Surface Plasmon in Nickel Nanoparticles

Vikash Sharma, Chanderbhan Chotia, Tarachand, V. Ganesan and Gunadhor S. Okram\*

UGC-DAE Consortium for Scientific Research, University Campus, Khandwa Road, Indore 452001, MP, India.

\*Email: okram@csr.res.in

Table S1 Sample synthesis conditions

| Sample | Solvent   | Surfactant | Reaction time (hours) | temperature | Crystallite size (nm) | Hydrodynamic diameter (nm) |
|--------|-----------|------------|-----------------------|-------------|-----------------------|----------------------------|
| Ni1    | 10 ml, OA | No         | 2.5                   | 210-220 °C  | 22.37                 | 1120                       |
| Ni2    | 4 ml, OA  | 2 g, TPP   | 2.5                   | 210-220 °C  | 8.50                  | 1000                       |
| Ni3    | 10 ml, OA | 1 ml, TOP  | 2.5                   | 210-220 °C  | 8.33                  | 542                        |
| Ni4    | 10 ml, OA | 10 ml, TOP | 2.5                   | 210-220 °C  | 1.31                  | 201                        |

Table S2 Conditions for changing physical environment of particles

| Sample | Additive | Additive quantity | Sample Ni4 quantity | Ethanol quantity |
|--------|----------|-------------------|---------------------|------------------|
| Ni5    | PVP      | 4 mg              | 2 mg                | 40 ml            |
| Ni6    | CTAB     | 4 mg              | 2 mg                | 40 ml            |
| Ni7    | EDTA     | 4 mg              | 2 mg                | 40 ml            |

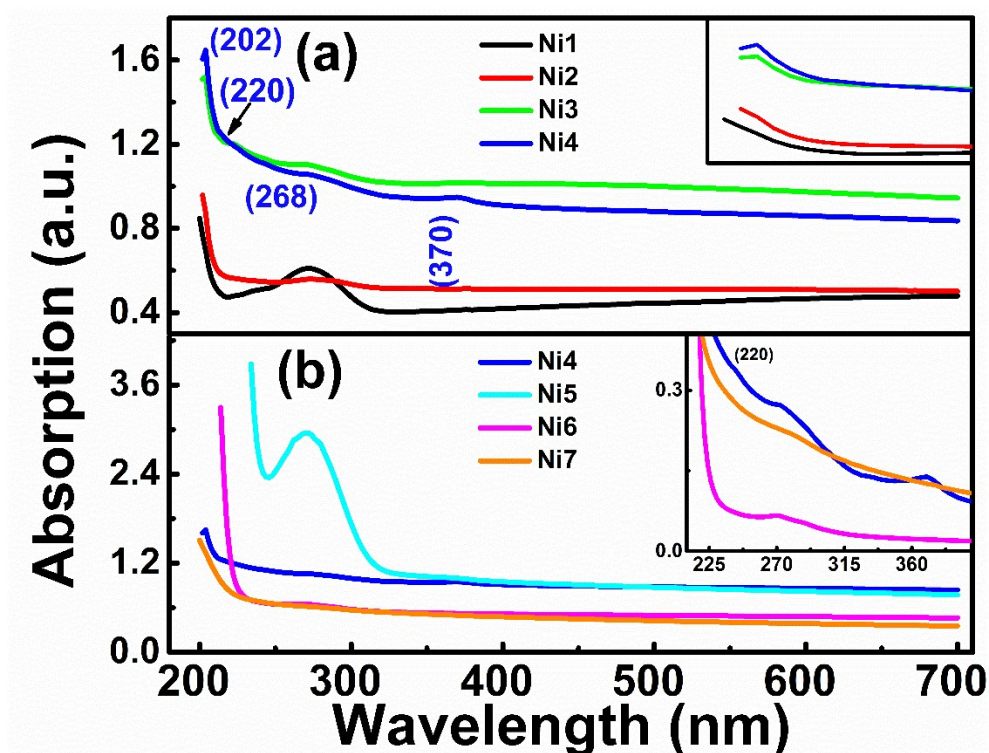

Figure S1 Absorbance spectra of (a) Ni1, Ni2, Ni3, and Ni4 of NPs and (b) in different dielectric environment.

**Table S3** Hydrodynamic diameter, zeta potential, mobility, conductivity, isoelectric point and surface plasmon resonance peak of Ni1, Ni2, Ni3, Ni4, Ni5, Ni6 and Ni7 samples.

| Sample | Hydrodynamic Diameter (nm) | Zeta-Potential (mV) | Mobility ( $\mu\text{cm}^2/\text{Vs}$ ) | Conductivity (mS/cm) | Isoelectric Point | SPR Peak Position (nm) |
|--------|----------------------------|---------------------|-----------------------------------------|----------------------|-------------------|------------------------|
| Ni1    | 1120                       | -01.80              | -05.13                                  | 0.0388               | Not found         | 272                    |
| Ni2    | 1000                       | -14.32              | -12.61                                  | 0.0321               | Not found         | 270                    |
| Ni3    | 542                        | -16.30              | -18.82                                  | 0.0299               | 3.39              | 268                    |
| Ni4    | 201                        | -35.33              | -72.29                                  | 0.0046               | 3.57              | 268                    |
| Ni5    | 680                        | -10.67              | -22.02                                  | 0.0073               | Not found         | 272                    |
| Ni6    | 1031                       | -09.53              | -21.19                                  | 0.0201               | 4.13              | 270                    |
| Ni7    | 159                        | -40.01              | -80.19                                  | 0.0051               | 3.03              | 274                    |
